# Supplementary material
Source: MDPI journal article supplement (https://www.mdpi.com/2073-4441/16/1/45)
Supplement: s1 [file s1]

## Supplementary Information

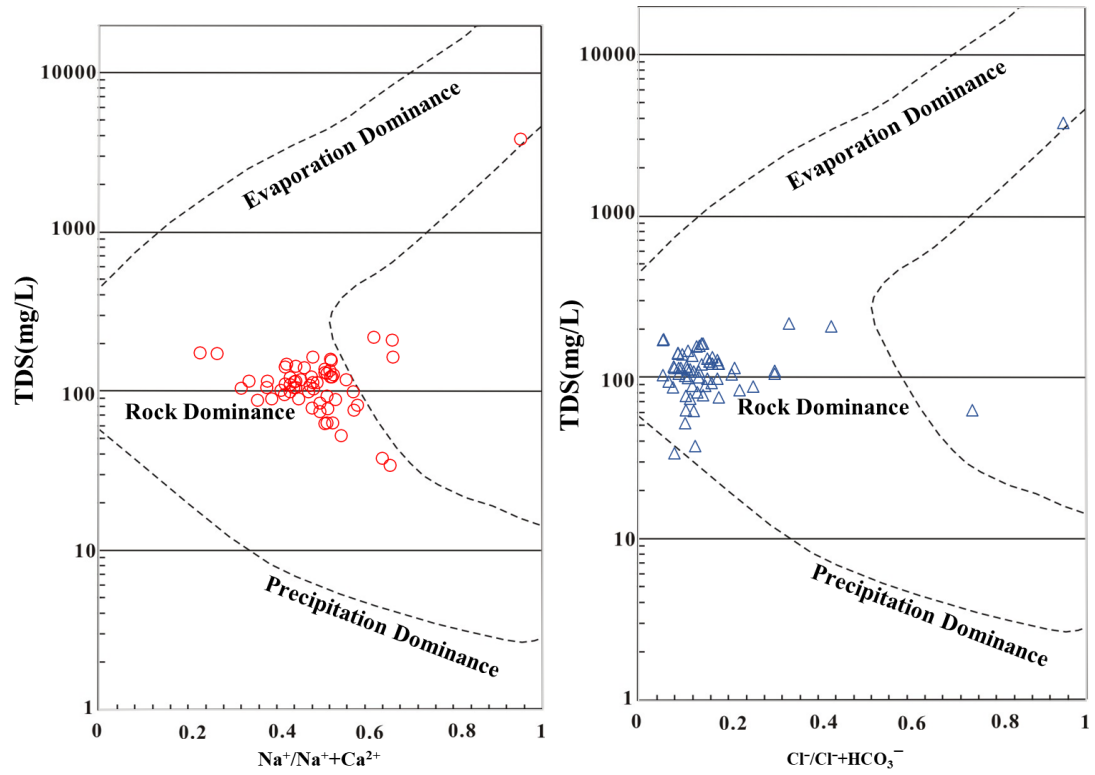

Figure S1. Gibbs Map of all samples in Jinjiang River Basin.

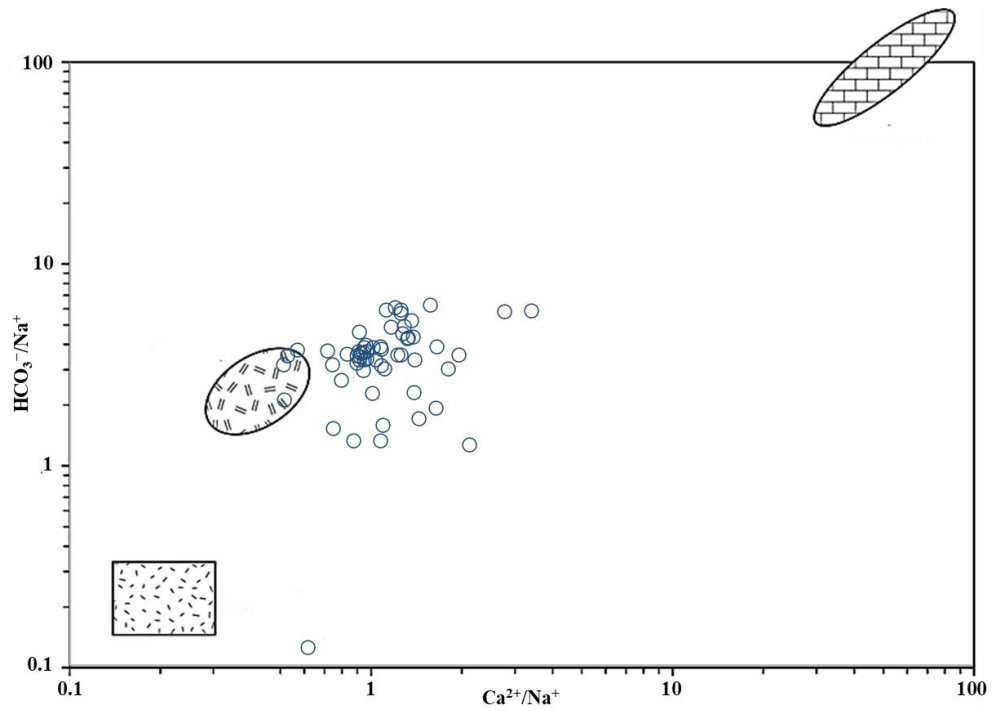

Figure S2. End-member diagram of all samples in Jinjiang River Basin.
